# Supplementary material
Source: PubMed Central journal article supplement (PMC7205389)
Supplement: jf9b08163_si_001.pdf [file jf9b08163_si_001.pdf]

## Supplemental material to

### Structure-dependent effects of cinnamaldehyde-derivatives on TRPA1- induced serotonin release in human intestinal cell models

Barbara Lieder<sup>1</sup>, Julia Hoi<sup>1</sup>, Nathalie Burian<sup>1</sup>, Joachim Hans<sup>2</sup>, Ann-Katrin Holik<sup>1</sup>, Leopoldo Raul Beltran Marquez<sup>1</sup>, Jakob P. Ley<sup>2</sup>, Hanns Hatt<sup>3</sup> and Veronika Somoza<sup>2</sup>

<sup>1</sup> Department of Physiological Chemistry and Christian Doppler Laboratory for Bioactive Aroma Compounds, Faculty of Chemistry, University of Vienna, Althanstraße 14, Vienna, Austria

<sup>2</sup> Symrise AG, Mühlenfeldstraße 1, Holzminden, Germany

<sup>3</sup> Riechforschung, Ruhr-University Bochum, Bochum, Germany

\* To whom correspondence should be addressed: Barbara.Lieder@univie.ac.at

Figure S1

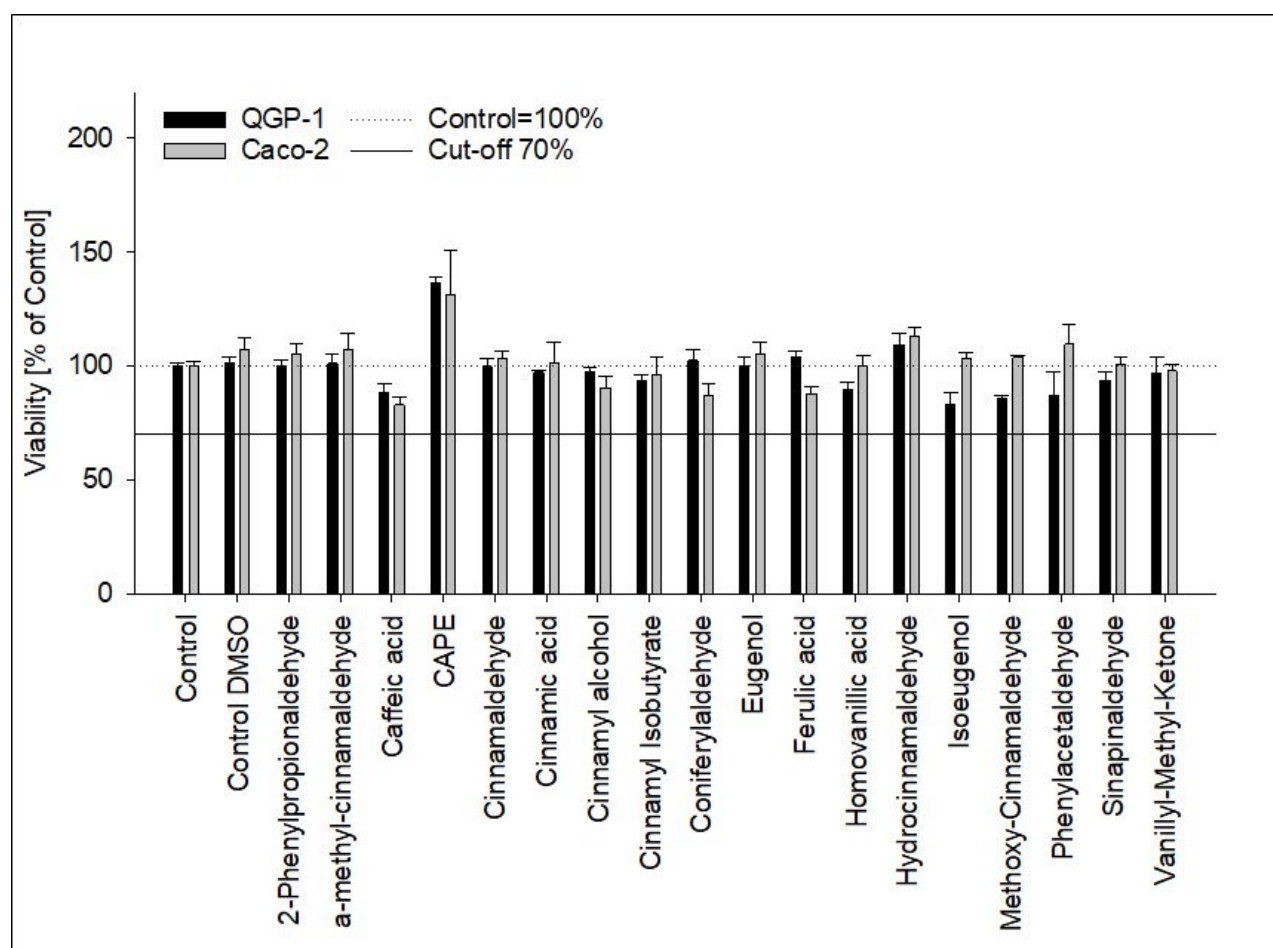

Cell viability of Caco-2 and QGP-1 cells after treatment with 0.5 mM of the test compounds used in the present study assessed via MTT assay. None of the tested compounds at .05 mM reduced cellular viability in both cell lines below 70% (black line), which was regarded as cytotoxic according to ISO 10993:5.

Figure S2:

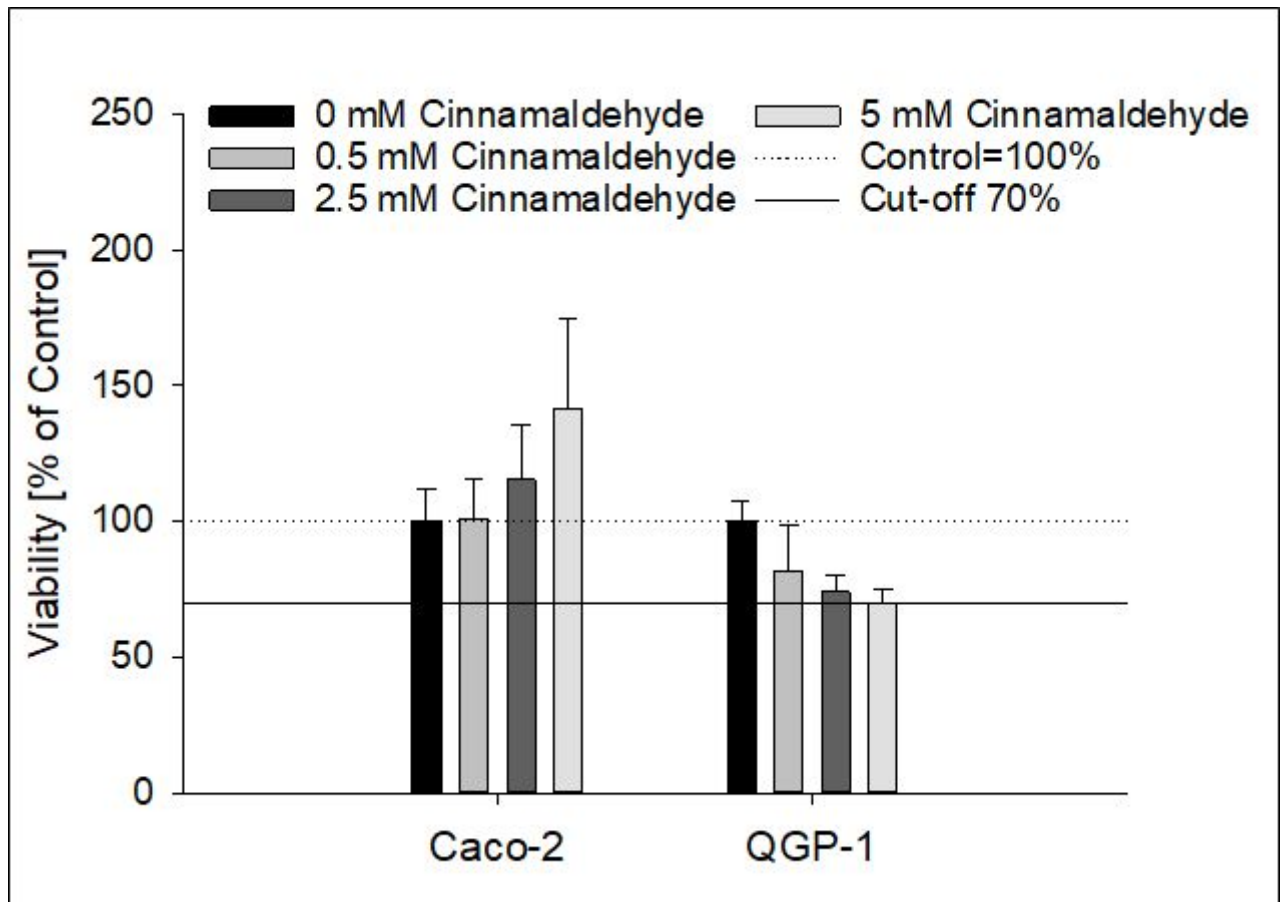

Cell viability of Caco-2 and QGP-1 cells after treatment with 0.5 to 5 mM cinnamaldehyde assessed via MTT assay. Concentrations leading to a viability below 70% (black line) were regarded as cytotoxic according to ISO 10993:5 and not further used for the serotonin assays.

**Figure S3:** Graphical representation of the matched-molecular pair analysis carried out with the software Vortex (Version 2019.04, Dotmatics Ltd., UK) including single atom changes and non-ring fragmentations (with maximum fragment size of 8 and minimum core size of 8 atoms, respectively), using both experimental readouts of TRPA1 activation and serotonin secretion by Caco-2 enterocytes as parameters of interest.

| Structure 1 | TRPA1_1 | Serotonin_1 | Structure 2 | TRPA1_2 | Serotonin_2 | Structure Core | R1              | R2              | Reaction                                  | Freq. | $\Delta_{TRPA1}$ | $\Delta_{Serotonin}$ |
|-------------|---------|-------------|-------------|---------|-------------|----------------|-----------------|-----------------|-------------------------------------------|-------|------------------|----------------------|
|             | 10.69   | 13.448      |             | 6.2231  | 6.5986      |                | $\cdot\text{H}$ | $\cdot$         | $\cdot\text{H} \rightarrow \cdot$         | 3     | -4.467           | -6.8495              |
|             | 8.8335  | 5.7217      |             | 5.6931  | 4.7534      |                | $\cdot\text{H}$ | $\cdot$         | $\cdot\text{H} \rightarrow \cdot$         | 3     | -3.1404          | -0.96833             |
|             | 3.6312  | 2.7811      |             | 0.92079 | 1.3874      |                | $\cdot\text{H}$ | $\cdot$         | $\cdot\text{H} \rightarrow \cdot$         | 3     | -2.7104          | -1.3937              |
|             | 8.4423  | 4.2997      |             | 10.69   | 13.448      |                | $\cdot\text{O}$ | $\cdot\text{H}$ | $\cdot\text{O} \rightarrow \cdot\text{H}$ | 2     | 2.2479           | 9.1485               |
|             | 8.046   | 1.7118      |             | 5.7886  | 15.841      |                | $\cdot\text{O}$ | $\cdot\text{H}$ | $\cdot\text{O} \rightarrow \cdot\text{H}$ | 2     | -2.2574          | 14.13                |
|             | 0.89169 | 1.5202      |             | 1.1996  | 2.8462      |                | $\cdot\text{O}$ | $\cdot$         | $\cdot\text{O} \rightarrow \cdot$         | 1     | 0.30792          | 1.3259               |
|             | 1.3263  | 1.0206      |             | 10.69   | 13.448      |                | $\cdot\text{O}$ | $\cdot\text{H}$ | $\cdot\text{O} \rightarrow \cdot\text{H}$ | 1     | 9.3638           | 12.428               |
|             | 0.92079 | 1.3874      |             | 3.6312  | 2.7811      |                | $\cdot\text{O}$ | $\cdot\text{O}$ | $\cdot\text{O} \rightarrow \cdot\text{O}$ | 1     | 2.7104           | 1.3937               |
|             | 9.73    | 5.0921      |             | 5.7886  | 15.841      |                | $\cdot\text{H}$ | $\cdot\text{H}$ | $\cdot\text{H} \rightarrow \cdot\text{H}$ | 1     | -3.9414          | 10.749               |
|             | 1.1996  | 2.8462      |             | 5.7886  | 15.841      |                | $\cdot\text{O}$ | $\cdot\text{H}$ | $\cdot\text{O} \rightarrow \cdot\text{H}$ | 1     | 4.589            | 12.995               |
|             | 1.1996  | 2.8462      |             | 9.73    | 5.0921      |                | $\cdot\text{O}$ | $\cdot\text{H}$ | $\cdot\text{O} \rightarrow \cdot\text{H}$ | 1     | 8.5304           | 2.2459               |
|             | 0.92079 | 1.3874      |             | 5.7886  | 15.841      |                | $\cdot\text{O}$ | $\cdot\text{H}$ | $\cdot\text{O} \rightarrow \cdot\text{H}$ | 1     | 4.8678           | 14.454               |
|             | 0.92079 | 1.3874      |             | 9.73    | 5.0921      |                | $\cdot\text{O}$ | $\cdot\text{H}$ | $\cdot\text{O} \rightarrow \cdot\text{H}$ | 1     | 8.8092           | 3.7046               |
|             | 0.92079 | 1.3874      |             | 1.1996  | 2.8462      |                | $\cdot\text{O}$ | $\cdot\text{O}$ | $\cdot\text{O} \rightarrow \cdot\text{O}$ | 1     | 0.27882          | 1.4587               |
|             | 4.4657  | 2.4716      |             | 5.7886  | 15.841      |                | $\cdot\text{H}$ | $\cdot\text{H}$ | $\cdot\text{H} \rightarrow \cdot\text{H}$ | 1     | 1.3228           | 13.37                |
|             | 4.4657  | 2.4716      |             | 9.73    | 5.0921      |                | $\cdot\text{H}$ | $\cdot\text{H}$ | $\cdot\text{H} \rightarrow \cdot\text{H}$ | 1     | 5.2643           | 2.6205               |
|             | 4.4657  | 2.4716      |             | 1.1996  | 2.8462      |                | $\cdot\text{H}$ | $\cdot\text{O}$ | $\cdot\text{H} \rightarrow \cdot\text{O}$ | 1     | -3.2661          | 0.3746               |
|             | 4.4657  | 2.4716      |             | 0.92079 | 1.3874      |                | $\cdot\text{H}$ | $\cdot\text{O}$ | $\cdot\text{H} \rightarrow \cdot\text{O}$ | 1     | -3.5449          | -1.0841              |
|             | 0.89169 | 1.5202      |             | 5.7886  | 15.841      |                | $\cdot\text{O}$ | $\cdot\text{H}$ | $\cdot\text{O} \rightarrow \cdot\text{H}$ | 1     | 4.8969           | 14.321               |
|             | 0.89169 | 1.5202      |             | 9.73    | 5.0921      |                | $\cdot\text{O}$ | $\cdot\text{H}$ | $\cdot\text{O} \rightarrow \cdot\text{H}$ | 1     | 8.8383           | 3.5719               |
|             | 0.89169 | 1.5202      |             | 0.92079 | 1.3874      |                | $\cdot\text{O}$ | $\cdot\text{O}$ | $\cdot\text{O} \rightarrow \cdot\text{O}$ | 1     | 0.029097         | -0.13276             |
|             | 0.89169 | 1.5202      |             | 4.4657  | 2.4716      |                | $\cdot\text{O}$ | $\cdot\text{H}$ | $\cdot\text{O} \rightarrow \cdot\text{H}$ | 1     | 3.574            | 0.95134              |
|             | 1.6743  | 0.80564     |             | 10.69   | 13.448      |                | $\cdot\text{O}$ | $\cdot\text{O}$ | $\cdot\text{O} \rightarrow \cdot\text{O}$ | 1     | 9.0158           | 12.643               |
|             | 0.89169 | 1.5202      |             | 4.4657  | 2.4716      |                | $\cdot\text{O}$ | $\cdot\text{H}$ | $\cdot\text{O} \rightarrow \cdot\text{H}$ | 1     | 3.574            | 0.95134              |
|             | 1.6743  | 0.80564     |             | 10.69   | 13.448      |                | $\cdot\text{O}$ | $\cdot\text{O}$ | $\cdot\text{O} \rightarrow \cdot\text{O}$ | 1     | 9.0158           | 12.643               |
